# Supplementary material
Source: PubMed Central journal article supplement (PMC2884186)
Supplement: NIHMS201389-supplement-1_si_001.pdf [file NIHMS201389-supplement-1_si_001.pdf]

## **Supporting Information**

# **Structural Assignment of 6-Oxy Purine Derivatives through Computational Modeling, Synthesis, X-ray Diffraction, and Spectroscopic Analysis**

Xinyun Zhao,<sup>a,b</sup> Xi Chen,<sup>a,b</sup> Guang-Fu Yang,<sup>a</sup> and Chang-Guo Zhan<sup>b,\*</sup>

*<sup>a</sup>Key Laboratory of Pesticide and Chemical Biology of the Ministry of Education of China, College of Chemistry, Central China Normal University, Wuhan 430079, P. R. China and <sup>b</sup>Department of Pharmaceutical Sciences, College of Pharmacy, University of Kentucky, 725 Rose Street, Lexington, KY 40536*

**Running Title:** Structures of 6-Oxy Purine Derivatives

**Supporting Information Available.** Two figures for <sup>1</sup>H NMR and IR spectra of compound **4**. This material is available free of charge *via* the Internet at <http://pubs.acs.org>.

### **Correspondence:**

Chang-Guo Zhan, Ph.D.  
Professor  
Department of Pharmaceutical Sciences  
College of Pharmacy  
University of Kentucky  
725 Rose Street  
Lexington, KY 40536  
TEL: 859-323-3943  
FAX: 859-323-3575  
E-mail: [zhan@uky.edu](mailto:zhan@uky.edu)

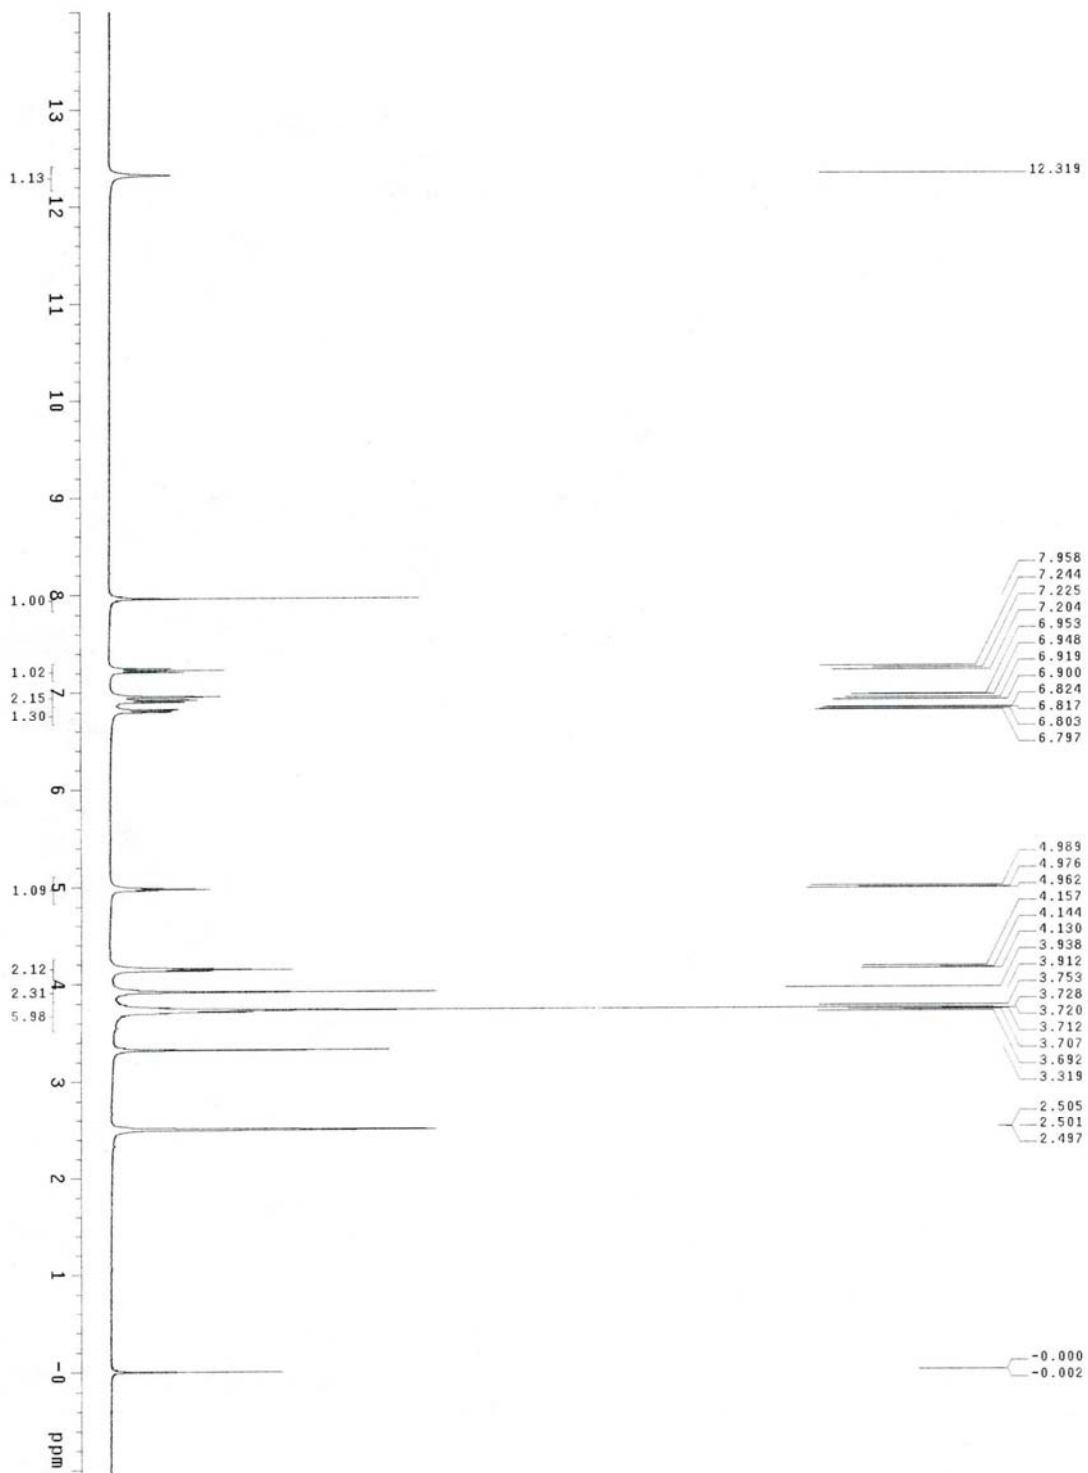

Figure S1.  $^1\text{H}$  NMR spectrum of compound **4**

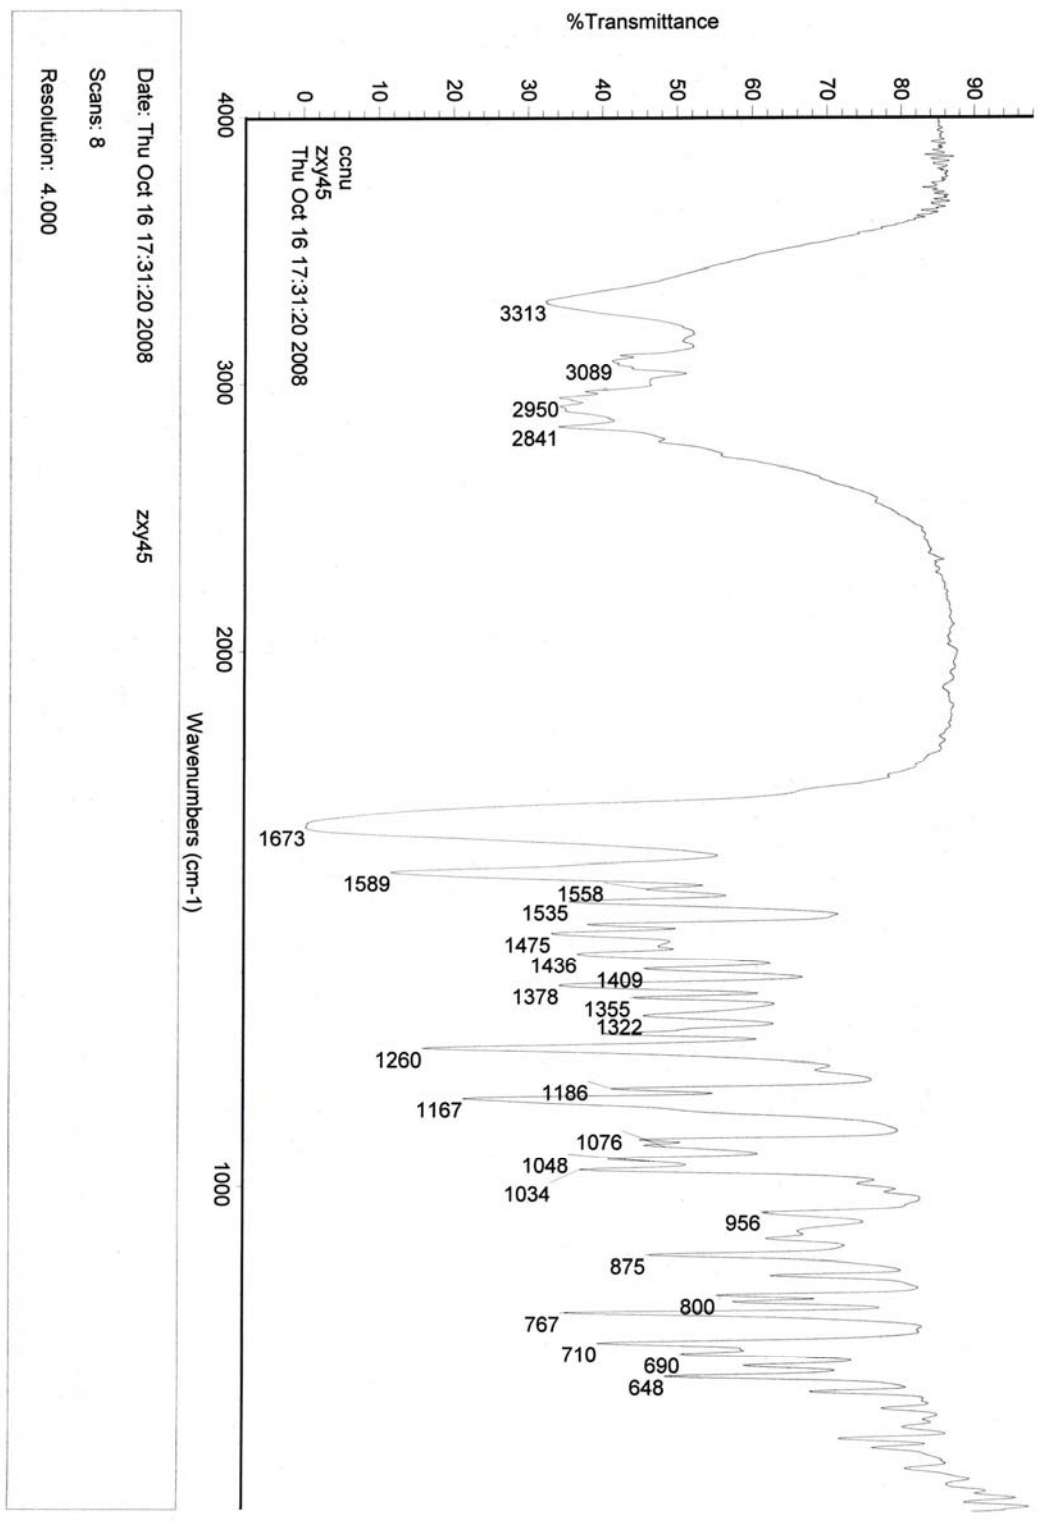

Figure S2. IR spectrum of compound 4
